# Supplementary material
Source: publisher site journal article supplement (https://www.dovepress.com/article/426260)
Supplement: Supplementary file 1 [file 11_Oct_2023_Supplementary_Figure1.pdf › 11_Oct_2023_Supplementary_Figure1.pdf]

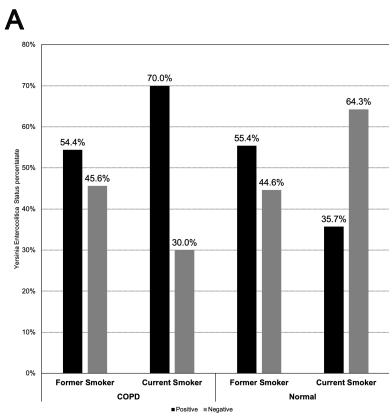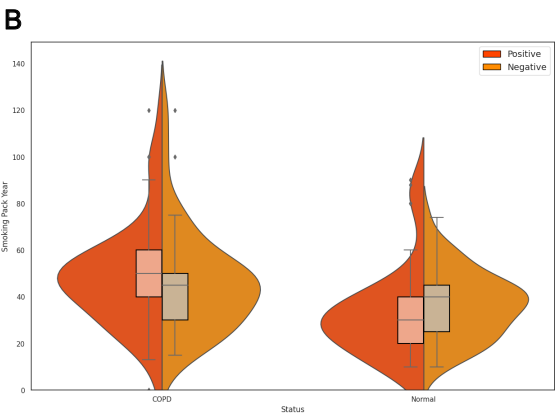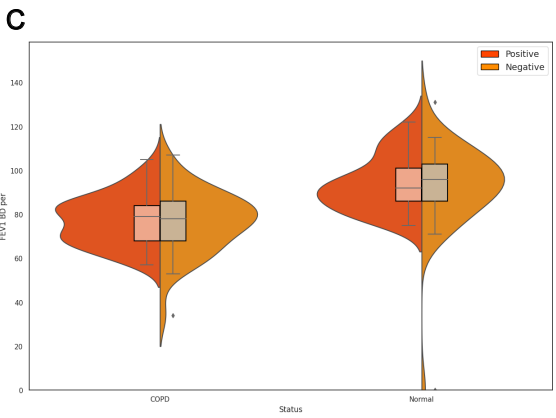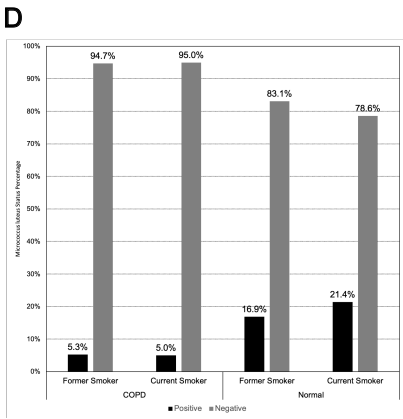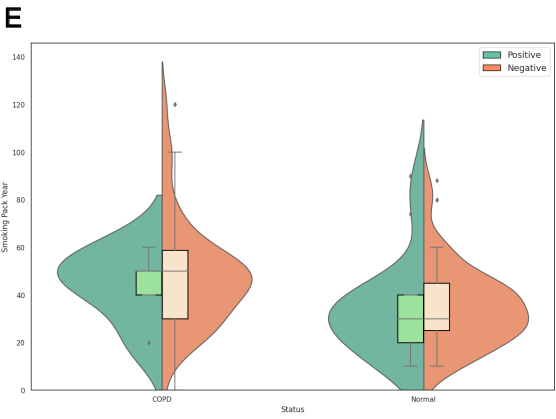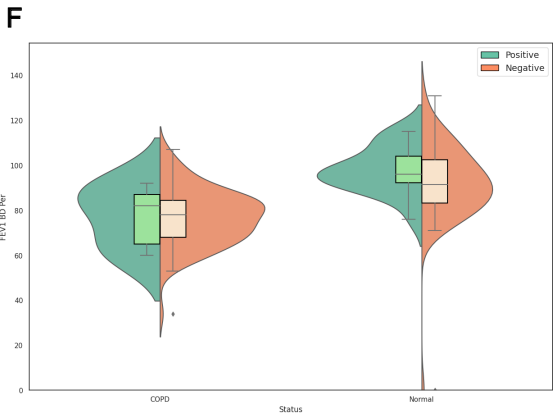

**Supplementary Figure1 Comparison of lung function and smoking history by *Yersinia Enterocolitica* and *Micrococcus luteus* infection**  
**A. *Yersinia enterocolitica* infection status by smoking history** **B. Smoking pack year by *Yersinia enterocolitica* infection status**  
**C. FEV1 percentage by *Yersinia enterocolitica* infection status** **D. *Micrococcus luteus* infection status by smoking history**  
**E. Smoking pack year by *Micrococcus luteus* infection status** **F. FEV1 percentage by *Micrococcus luteus* infection status**
